# Supplementary material for: Teaching assistants' perceptions of a training to support an inquiry-based general chemistry laboratory course
Source: Royal Society of Chemistry journal article supplement (doi:10.1039/c5rp00104h), 2015-01-01
Supplement: c5rp00104h3.pdf [file c5rp00104h3.pdf]

## Appendix C TA SURVEY

Please answer the following questions to the best of your ability. Your responses will not be graded but will be used to guide the TA training and for research purposes if you provide consent. If you do not feel comfortable answering a question, please leave the question blank.

### **Background Experiences:**

1. What year are you in your program? (i.e. 3<sup>rd</sup> year undergraduate, 1<sup>st</sup> year graduate)
2. If you are a graduate student, what prior degree(s) do you have? Please indicate the type of degree and school(s) you received each degree.
3. Have you had any prior research experience? Yes/No
  - a. Please indicate the general type of research (i.e. biochemistry, organic synthesis)
  - b. Where was the research conducted? (i.e. during undergraduate in a faculty research lab, at a pharmaceutical company)
  - c. How long were you involved in the research?
4. Have you had any prior teaching experience? Yes/No
  - a. What did you teach? (i.e. undergraduate organic chemistry, high school physics)
  - b. When did you teach?
  - c. What were your responsibilities?
5. What experience, if any, have you had with inquiry teaching?
  - a. As a student?
  - b. As an instructor?
6. What made you decide to major in chemistry (undergraduate TAs) or get a Ph.D. in chemistry (graduate TAs)?
7. At this point, what do you intend to do when you graduate?

### **Demographics:**

1. How old are you?
2. What is your ethnicity?
3. Are you an international student? Y/N
4. Male/Female

### **Post-survey Professional Development Feedback:**

1. What was your most positive experience this semester?
2. What was your least positive experience this semester?
3. Describe your experience working with students in lab.
4. Describe your experience holding office hours.
5. What suggestions do you have to improve the lab course in the future?
6. What was the most helpful component of the training?
7. What was the least helpful component of the training?
8. What suggestions do you have to improve the training in the future?
9. Any last thoughts?
