# Supplementary material for: Teaching assistants' perceptions of a training to support an inquiry-based general chemistry laboratory course
Source: Royal Society of Chemistry journal article supplement (doi:10.1039/c5rp00104h), 2015-01-01
Supplement: c5rp00104h4.pdf [file c5rp00104h4.pdf]

## Appendix D

### TA INTERVIEW

This interview is to follow up on your experiences during the TA training and your answers to survey questions. This interview will be recorded and the tape will be destroyed after the data is transcribed. No identifying information will be used in the data analysis.

1. First, I'd like to follow up on your background experiences
  - a. When did your initial interest in science begin?
  - b. Tell me more about your research experience
  - c. Tell me more about your teaching experience
  - d. What was your General Chemistry lab experience like?
2. I would like to ask you about your experiences with the TA training.
  - a. Can you describe your experience of attending the week-long TA training? Probe: How did your thoughts about the training change before and after, if at all?
  - b. Explain how the TA training prepared you for TAing students in guided inquiry
  - c. What suggestions do you have to improve the training for next year?
3. These questions focus on your TA experiences thus far.
  - a. How did your involvement as a TA come about?
  - b. How would you describe your role as a TA?
  - c. How has your idea of TAing general chemistry labs changed, if at all?
  - d. What is your favorite part of TAing?
  - e. What is your least favorite part of TAing?
  - f. What frustrates you most about TAing?
  - g. What would make being a TA easier?
4. You've been very helpful. Are there other thoughts or feelings you'd like to share with me to help me understand what the experience of being a TA has been like for you?
